# Supplementary material
Source: PubMed Central journal article supplement (PMC3286945)
Supplement: 1115495109_pnas.201115495SI.pdf [file 1115495109_pnas.201115495SI.pdf]

# Supporting Information

Navaroli et al. 10.1073/pnas.1115495109

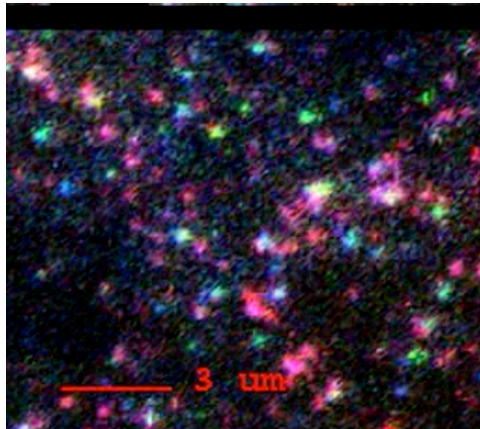

**Movie S1.** Dynamics of Tf flux into Rabenosyn-5-enriched endosomes. Cells coexpressing EGFP-Rabenosyn-5 (green) and TagRFP-T-Clathrin (red) were imaged at 1 Hz (1 frame per second) for ~150 frames, and exposed to Tf-DyLight-649 (blue) for 5 min (300 frames), after which Tf was removed and imaging continued for an additional 300 frames. The addition and removal of Tf-DyLight-649 can be detected by the flash of white light.

[Movie S1](#)
